# Supplementary material for: Normal mitochondrial function in Saccharomyces cerevisiae has become dependent on inefficient splicing
Source: eLife. 2018 Mar 23;7:e35330. doi: 10.7554/eLife.35330 (PMC5898908; doi:10.7554/eLife.35330)
Supplement: Supplementary file 1. — The file consist of lists of qPCR and cloning primers, as well as sequences of RNA FISH probes, as separate tabs. [file elife-35330-supp1.xlsx]

## Sheet: qPCR primers
			FWD primer	RC primer
	YBL099W	ATP1	ATG TTG GCT CGT ACT GCT GCT ATT C	GCA ATA CCA TCA CCG ACT GCA AG
	Q0085	ATP6	ATG TTT AAT TTA TTA AAT ACA TAT ATT ACA TCA CCA TTA	TAA ATA GCT TCT TGT GAA ATT AAT CAT CTT GAA C
	YNR001C	CIT1	ATG TCA GCG ATA TTA TCA ACA ACT AGC AA	GGT TTT ACC GTG TTC TTT CTT GAA TTT TTT A
	Q0105	COB	ATG GCA TTT AGA AAA TCA AAT GTG TAT TTA AGT T	TAT GCA CAT CTC TTA TAA TAT GTT CAA CAG A
	Q0045	COX1	ATG GTA CAA AGA TGA TTA TAT TCA ACA AAT GC	ATT AAA GCA GGC ATT ACT AAG AAG AAA ATC A
	Q0250	COX2	ATG TTA GAT TTA TTA AGA TTA CAA TTA ACA ACA TTC AT	GTC CAT GTT TAA TAT ATT TAT ATG CAA TAG GAT T
	YGL187C	COX4	ATG CTT TCA CTA CGT CAA TCT ATA AGA TTT TT	TCT AAC CTA GCT AAA CCA GTT TCT TGA T
	YJR104C	SOD1	ATG GTT CAA GCA GTC GCA GTG TTA AA	TTG AAA GGA TTG AAG TGA GGA CCA G
	YHR008C	SOD2	ATG TTC GCG AAA ACA GCA GCT GC	ATT GGT CAA CAG CAG TGT TGA ATC C
	YER100W	UBC6	ATG GCT ACA AAG CAG GCT CAC AAG	GGT TTG TAT GGA TAA TCA GAC GGG AA
	YBR072W	HSP26	ATG TCA TTT AAC AGT CCA TTT TTT G	TTA GTT ACC CCA CGA TTC TTG A
	YJL159W	HSP150	TGTCTCTCAAATTGGTGATGGTCAA	TCTTTGGGGCTAAAGTAGTGGTGGT
	YOR136W	IDH1	GCT TAA CAG AAC AAT TGC TAA GA	GTT GAT GAT TTC ATT CGT GAA GTC
	YKL148C	SDH1	ATG CTA TCG CTA AAA AAA TCA GCG CTC	TTG TAG CCC GCC TCG GCA AG
	YLL041C	SDH2	ATG TTG AAC GTG CTA TTG AGA AGG AAG	TTG ATC TTT AAC AGC GCA TCA AGT ACC
	YCR005C	CIT2	ATG ACA GTT CCT TAT CTA AAT TCA AAC AGA A	TCC CTG GAA TAC CTC TCA TAC CAC
	YBR179C	FZO1	TCGTGGAGCTCACTCAAGAA	GGTACACGCAAAACATCACG
	YOR211C	MGM1	GGCAGACCAGCCAATAGAAC	CAGGATCCACCAAATCCAGT
	YLL001W	DNM1	GAATCGAAGCAAACGAAGGA	CTCTCGGTCAGTGGAGGTTC
	YIL065C	FIS1	GGACGCATACGAACCACTCT	ATTCTCGTCTACGGGACTCG
	Q0050	aI1	TTT ACA TGG TAA TTC ACA ATT ATT TAA TG	AATACAGCATGACCAACTACTAAAA
	Q0055	aI2	GGT CAT GCT GTA TTA ATG ATT TTC T	CCAATTAAAGCAGGCATTACTAAGA
	Q0060	aI3	GCT TTA ATT GGA GGT TTT GGT AAC	GTAGCTCCAATTATTAATGGTAATAAATA
	Q0065	aI4	TAC GAG CAT TTA TTT TGA TTC TTT GGT	GAATAATTAAAATATATACTTCAGGGTG
	Q0070	aI5α	CAA CAG GAA TTA AAA TTT TCT CAT GAT TA	TTGAACCACCATGGATTAGAGC
	Q0075	aI5β	TCA TTA GAT GTA GCA TTC CAC GAT	AATGTCCCACCACGTAGTAAGT
		aI5γ	TAC TAC GTG GTG GGA CAT TTT C	AATAGCACCCATTGATAATACATAGT
		bI1	GGT TAT TGT TGT GTT TAT GGA CAG A	ACCTCAATGTGACAATTGTGATAG
	Q0110	bI2	TGT CAC ATT GAG GTA ATA TAA ATA TCG	CTGAGAATAAATTAGTAATAACTAGTGC
	Q0115	bI3	TTG TAT CTT GAT TAT GAG GTG GGT T	GGATTAGAGGGTTAGATACTGAG
	Q0120	bI4	ATT CTA TTC ACC TAA TAC TTT AGG TCA	GATTACCAGGAATATAGTTATCAGGA
		bI5	ATC CTT TAG TAA CAC CAG CAT CTA T	AATGGTAATAAGTATCATTCAGGTACA
	fbT		TTT ATG GAC AGA TGT CAC ATT GAG	ATC ATT CAG GTA CAA TAG ATG CTG
	fxT		CAC AAT TAT TTA ATG TTT TAG TAG TTG	GAT AAT ACA TAG TGA AAA TGT CCC A
	fb1		ATG GCA TTT AGA AAA TCA AAT GTG T	ATT GTG ATA GGT AGA TCT TTA CAA A
	fb2		ATG GCA TTT AGA AAA TCA AAT GTG T	CAA GAA AAT AAT ATT ATT TAT AAA TTA TTA TTA TT
	fb3		GCA CTA GTT ATT ACT AAT TTA TTC TC	CTT TAA ATG TTT AAA TAG TTA CAT ATT TGA
	fb4		GCA CTA GTT ATT ACT AAT TTA TTC TC	CTT TAA TAA TAA ATA TAA AAT GGA CTA TAT C
	fb5		GCA CTA GTT ATT ACT AAT TTA TTC TC	ACA ATT TAT ATA TGT TAA CAT AAG ATT ATT T
	fx1		ATG GTA CAA AGA TGA TTA TAT TCA AC	ATG AAA TAG CAA ATT AAC CTA TGT TG
	fx2		ATG GTA CAA AGA TGA TTA TAT TCA AC	GTA GAG TAG CAA ACC TAT CTG AA
	fx3		GAT ACA GCA TTT CCA AGA ATT AAT AA	CTT GTT ATA TAT ATA TAT ATT ATA TAT ATA TAA T
	fx4		GAT ACA GCA TTT CCA AGA ATT AAT AA	TCT TTT ATT TAA CTT TAA AAC ATT TCA GTT T
	fx5		GAT ACA GCA TTT CCA AGA ATT AAT AA	ATC CCG ATA GGT AGA CCT TTA C

## Sheet: cloning primers
Upstream flanking region of rtg2
FW1_rtg2	CAA ACC TCA CTA GAC GAC TAC
RC1_rtg2	ATA GTC GAC AGA CAT CTA GTC TTT AAA TAC TTG
Downstream flanking region of rtg2
FW2_rtg2	GCA CGC CAA TTT TAA CCC TCT C
RC2_rtg2	GCG ATA GTG ATA CCG AGA CTG A
Upstream flanking region of hap4
FW1_hap4	TCGATTTTGCAGATTGTTCTAAAAGTAAAT
RC1_hap4	TATCAGCTGAAAGTCTTTGCGGTCAT
Downstream flanking region of hap4
FW2_hap4	TATGAGCTCAATAGGCATGTTGCAATA
RC2_hap4	TCTCTTGACGTGTTTCACCATACG
Hygromycin resistance cassette, amplified from pAG32
FW_HygB	CGTACGCTGCAGGTCGAC
RC_HygB	ATCGATGAATTCGAGCTCG
Promoter point mutations insertion
cox1	ATTGATATAAGTAATAGATA			-->	ATTGAAATAAGTAATAGATA
upstream flanking region primers
FW_u_cox1	CCG GGA CTT ATA TAT TTA ATA CTA AAA A
RC_u_cox1	AC TTA TTA TTT AAT ATT ATA TAT TAC TTT TTA GAGCTC AT
downstream flanking region primers
FW_d_cox1	AT CAGCTG T AAT AAT AAT ATT ATT AAT ATT TTA TAT AAA TAA
RC_d_cox1	AAT TAT TGT TAT ATC TAA AAG GAT AAT AAT ATA TTA
cob	TATTATATAAGTAATATATA			-->	TATTAAATAAGTAATATATA
upstream flanking region primers
FW_u_cob	ATA TTT AAA GAA GGA ATT GTT TAT ATA TAT TAA TAT
RC_u_cob	TTT CTT ATA ATT ATA TTA AGA TTA TAT ATA TAA ATA G GAG CTC AT
downstream flanking region primers
FW_d_cob	AT CAG CTG AAA ATA ATA TAA AAT AAT TAT AAT TCA ATT TAT ATA TTA A
RC_d_cob	ATA TAT AAT TAT TAT TAT TAT TAA TAA ATT ATA AAA ATA AAA

## Sheet: RNA FISH probes
	cox1 gene
	aI2 intron	aI5β intron	exons
1	GTGCGCCGTTTCGCTTAATTT	ATTAATTTAATAAGTGTCGTGC	ATGGTACAAAGATGATTATAT
2	CTGTATTGAAGTGTTAATTGAT	GGTTATATATATATATATATTA	CAACAAATGCAAAAGATATTG
3	TATCTCTGTTTATTCAATTAAT	GCTAACGGGGAAACTCTTATAA	GTATTATATTTTATGTTAGC
4	CTTTACCGTATCATTTTGGTTC	GACAATCCCGTGATAACTTTAA	TTTTTAGTGGTATGGCAGG
5	TTAGTAGTAACATACATAGTAT	GTATTGTAGAGACTAAACGTG	CAGCAATGTCTTTAATCATTAG
6	GATACGTAAACCATATGGCTTA	GATTTTAATATTATTTAAATAT	GCACCTGGTTCACAATATTTAC
7	GGGGCCAACTCAACGGGGACA	GAGATAGTCCAATCTTATATG	GGTAATTCACAATTATTTAATG
8	GCATGCCATAAAAGCGCTGGAG	CAATTAATATCTCCTTTTGGG	GTAGTTGGTCATGCTGTA
9	CAGCCAGCGCAAGGTAAGAACT	GTTCCGGTCCCTGGTCCGGCC	GTAATGCCTGCTTTAATTG
10	GTCTTCATAGTACCCAAATTTA	CGAAACTAAAGATATTAAG	TATTTATTACCATTAATAATTG
11	GTGAGATACTTTAGTACTTTAT	GAATCAATTATAAATAATTATA	GCTACAGATACAGCATTTCC
12	GCAAGGAAGGAAGACAGTTTAG	GATAATTATACTGAAGAAGAAA	GAATTAATAACATTGCTTTTTG
13	GATTAATACTACGGATTTTTC	CTGGATTATTTGAAGGAGATGG	GTATTACCTATGGGGTTAG
14	GAAAATAATCATAATAAACTTG	GTTTTTCAATTACTTTTTCTTT	GTTTAGTTACATCAACTTTAG
15	GTCAGATATTAGAATGTTATTA	GATGTTTTATTAGCTAATTATT	GAATCAGGTGCTGGTACAGGG
16	GGTTCTAATAATATTACCTTAG	GTCTTTATTTTAAAATTGGTC	CTGTCTATCCACCATTATC
17	GGATTAATATTTCATATTTAAA	CAGCTAAATATAATTTTAATAA	CTATTCAGGCACATTCAGGACC
18	CTAAAGATATTAACACTAATAT	CAGCTGTTAAATGAAATATTAT	GTGTAGATTTAGCAATTTTTGC
19	GAAATTCCTAAAACATCTGGAG	GAAGTATTTATAAATTATATTA	CATTTAACATCAATTTCATCAT
20	GACCTTTAAGTGTTGGAAATCC	GGTAAATTATTAACATATAAAA	GGTGCTATTAATTTCATTG
21	TTGTACAAGAAAGTATGAGAAT	CCTTGATTAACAGGTTTTAAT	CAACATTAAATATGAGAAC
22	GTTAATTAATGTATTAAATGAG	GCTGATGGTTATTTTTATCTAG	GGTATGACAATGCATAAATT
23	GGAATTCCTCAAGGTAGTGTTG	CATAAAAATAGTCAATGATTAA	GTATGATCAATTTTCATTAC
24	GAGGTAGAAATCCAATTTATAA	GTCCGGCCCGCCCCCGCG	CGTTCTTATTATTATTATC
25	GATTAGATTAAGAGACCATTAC	GCGGACCCCAAAGGAGATATTA	CCTGTATTATCTGCTGGT
26	GGTGTAATGGGTTCTCATAATG	CTTGGTGGTATTTTAAAAAGAG	GAAGTATCAGGAGGTGGTGACC
27	GGGTATGATGTAAAAGTTACAC	CTGGTGCTACAGCTTATATTTA	GAGCATTTATTTTGATTCTTTGG
28	GGGTTAGACATCATACTAGTTT	GCTCAATCATCAAAAGCTATA	CACCCTGAAGTATATATTTT
29	GCCCCTATTAGAAGTATTGTAA	CCTTTTATTGAATATTTTAAT	GGCTTCAATTGGATTATTAGG
30	GGCTATTGTTCTCATGGTATT	CCATTAAGTCTTAGAAGATATA	GGATTAGATGCAGATCTTAGAG
31	CCCAGAGGGGTTGGAAGATTAA	CAATATTTATTATTAAATATTG	GCTCTAATCCATGGTGGTTC
32	GGTAGAGGTATTATAAACTATT	CTTATTAAAATTAAATAAATTA	GGGTGGTTTAACTGGTGTTGCC
33	GGTAGAATTACATACATTTTAT	CTTAATTCTTTATTAATATTA	CTTACTACGTGGTGGGAC
34	GTTGATCCTCATTCAAAAGTTA	GAATTAATATTATTACAAAGTG	CTATGTATTATCAATGGGTGC
35	GATTCTAATTATACACCTGATG	CTTTAGAAATAAAAAATG	GCAGGATACTATTATTGAAG
36	GATAGATATAAATATATGTTAC	GAGTTAAAATTATTATTAATAA	GGGGCTAATGTTATTTTC
37	GTGGTATTTGTCAAATTTGTGG	CTTCATTATAACAATATCG	GGTATTAATGGTATGCCTAG
38	CATCACGTAAGAACATTAAATA	GATAATATTAAAGAGTAAAAT	GATTATCCTGATGCTTTCGCAG
39	CTATCTGTAAAACATGTCATTT	CTTAAAGTGTTAATTAAA	GTCGCTTCTATTGGTTCATTC
40	GTTCATCAAGGTAAATATAATG	ATATTCTTTTTTTTTTATG	GATCAATTAGTTAATGGATTAA
41	CAGGTTTATAATAATTATTAT		GCACCTGATTTTGTAGAATC
42	CTATTAAATATGCGTTAAATGG		CACCAGCTGTACACTCATTTAA
43	GCCGTATGATATGAAAGTATC		CACCAGCTGTACAATCTTAA
44	CGGTTCGGAGAGGGCTCTTTTA
45	GATAGGTTTGCTACTCTAC
